# Supplementary material for: Spatial transcriptomics and in situ immune cell profiling of the host ectocervical landscape of HIV infected Kenyan sex working women
Source: Front Immunol. 2024 Dec 2;15:1483346. doi: 10.3389/fimmu.2024.1483346 (PMC11646855; doi:10.3389/fimmu.2024.1483346)
Supplement: Supplementary file 4 [file Table4.xlsx]

## Sheet: Uniq Epi
Supplementary Table 4: Uniquely differentially expressed genes per cluster comparing the study groups
name	n	Uniqe_int
Superficial	8	TFF3, PLSCR1, PIGR, DUSP5, C3, LGALS7, SCGB1D2, TSC22D2
Low_IM:Basal	27	CALML3, RPL27A, UPK3BL1, ANXA1, AHNAK, EDN3, ACTN4, ANXA8L1, PDCD4, FOSL2, PABPC1, PABPC3, ATP5ME, GJA1, TMA7, ATP5MD, RPL41, CCZ1B, RXRA, GZMK, RPLP1, HLA-DRB5, CRABP2, GNAS, RPL30, SLC25A5, RAPGEFL1
High_IM:Basal	14	BNIPL, RPS21, DSG1, RPS29, RPS15A, HSPA8, RPS18, RPL21, RPL38, TNFRSF21, RPLP2, IGHM, IFITM3, KRT13
High_IM:Low_IM	11	S100A6, MUC21, IL36G, NKG7, CEACAM1, PLA2G4D, KRT6B, LY6D, FMO2, CDH3, TAP1
Superficial:Basal	1	CD74
Superficial:High_IM	4	WFDC2, DEFB4B, FTH1, KLK7
High_IM:Low_IM:Basal	20	A2ML1, RPS27, RPS16, RPS12, RPL34, RPS19, SERPINB13, ID1, RPL37, IGLC2, KRT14, RPL18A, PPDPF, CALML5, RPL27, FAU, KLK10, RPS28, RPS20, KRT17
Superficial:Low_IM:Basal	2	KRT10, KLK12
Superficial:High_IM:Basal	6	FLG, HLA-DRB1, KLK5, STAT1, SAA1, PAX8-AS1
Superficial:High_IM:Low_IM	6	SLPI, CCL5, SPINK5, CRISP3, LYZ, LOR
Superficial:High_IM:Low_IM:Basal	27	IGHG1, S100A7, DEFB4A, IGHG2, IGHG4, B2M, IFI27, HLA-B, IGHG3, IGKC, KRT4, MUC5B, KRT16, SPRR2F, IGLC1, FABP4, H19, S100A11, S100A2, S100A7A, OLFM4, TYMP, PI3, ALOX12, MT2A, TMSB10, SOD2
Basal	95	RPL26, RPL23A, RPL35A, RPL36, RPS25, TPT1, ZNF703, ENSA, VAV3, RPL36A, CCND1, RPS3A, SGK1, RPL39, SLC9A3-AS1, DSC2, CD82, H2AFZ, IFITM1, NBL1, BTF3, NAGK, RPL7A, RPL17, CYP4B1, KRT1, ALDH3B2, RPL24, ZFAS1, RPL37A, NPM1, NFIC, RPS27A, RPL32, NDRG4, RPL15, RHOV, CD9, COL9A1, RPS23, GABRP, PKP1, CASP14, RRM2, WNT4, XIST, MZT2A, HNRNPF, GZMA, SSBP3, LSM14B, PHGDH, RAB3D, SEMA3F, SNHG6, C1QBP, ERBB2, …
Low_IM	23	MGST1, PITX1, ACTN1, MKNK2, IGFL1, S100A10, PALLD, BICDL2, ENDOU, ESR1, S100A14, WASF2, EPS8L2, CAPN1, METTL7A, TMEM79, ECHDC2, BAK1, HMGCS1, TNFAIP2, TGM1, EIF4A1, AMACR
High_IM	56	SPRR3, SFTA2, RHCG, APOBEC3A, EMP1, APOL1, HCG22, ISG15, BST2, SAMHD1, ASPG, HLA-E, AQP3, PITHD1, RIOK3, BNIP3, AC005083.1, SEC61B, C4orf3, NDUFS5, CYB5R1, DMKN, ARHGAP27, FAM25A, ELL2, GNG5, IL18, ANKRD37, IFI44, PLA2G4E, MAP7D1, CLIC3, DYNAP, TMSB4X, GLUL, SLC26A9, KIF21A, SAA2, IFI16, CYBA, IRF1, VEGFA, CEBPD, PKP3, PI4K2B, ITPR3, RPSA, SLC6A9, CAP1, CD36, RNASEK, LYPD2, RPL13A, UBE2L6, PNLIPR…

## Sheet: Uniq Sub
name	n	Uniqe_int
Clus_4:Clus_1	26	B2M, HLA-B, H19, RPL34, KRT16, HLA-DRB1, MUC21, IGHGP, S100A2, CCL5, IGFBP6, NNMT, KRT14, DEFB4A, CNFN, IFI27, CALML5, TAP1, OLFM4, PABPC3, IFITM1, PI3, MAL, PI16, CRISP3, TRBC2
Clus_1:Clus_10	9	APOD, DPEP1, NEAT1, ALOX12, PEMT, PTN, IGFBP7, MT1M, TIMP3
Clus_4:Clus_10	16	SPINK5, RPS29, DST, KRT1, CRCT1, FTH1, KRT13, KRTDAP, RHCG, S100A14, PDGFRA, MT1E, HLA-DRB5, SCGB1D2, A2ML1, CD3D
Clus_4:Clus_1:Clus_10	30	IGHG1, IGHG2, IGHG3, S100A7, IGHG4, IGKC, KRT4, MT2A, IGLC2, IGLC1, FABP4, RPS27, SPRR3, RPS15A, TMSB4X, KRT10, IGHM, RASD1, WFDC2, RPL41, SOD2, FTL, TGM2, MUC5B, IGLC3, SFRP2, LUM, FAU, SLPI, PIGR
Clus_1	14	CLU, EMP1, TRBC1, COL1A2, S100A11, AQP1, CPNE7, PLA2G4D, IGFBP5, A2M, CST7, FRZB, NEFM, GNAS
Clus_4	83	RPL37, CALML3, RPL30, RPL23A, IRF1, CRABP2, RPL39, RPL26, RPS20, MSMO1, RPL35A, NKG7, FAM25A, HLA-A, SQLE, RPS12, ADRA2C, HSPA8, RPS27A, PITX1, LGALS7B, YBX1, TMSB10, FGFBP1, PFN1, CXCL14, CRNN, RPS25, ATP5MD, RPL38, CD74, HLA-DPB1, UQCR10, KLK10, S100A7A, SERPINB13, PABPC1, COL9A1, CD48, ATP5F1E, SARAF, HLA-DQB1, POMP, C1QB, COTL1, SEC61B, ADIRF, ATP5PF, LAMB1, CASP4, IFITM3, UPK3BL1, RPL22L1, C…
Clus_10	36	MTRNR2L12, CCDC80, C3, SPRR1B, KRT34, SFN, CSTA, WNT16, DERL3, APCDD1, SAMD11, ACTB, MZB1, S100A8, LOXL4, TWF2, MTRNR2L8, CD81, AKAP13, SERPINE2, COL14A1, SMOC2, ZBTB16, RPL13A, FLG, RPS21, MXRA5, MEDAG, MZT2A, CTSK, MAP4K1, SERF2, LGALS7, IGF1, KRT6A, DIO3

## Sheet: Overlap Epi
name	n	intersections
Superficial	54	IGHG1, S100A7, DEFB4A, IGHG2, IGHG4, B2M, IFI27, HLA-B, IGHG3, SLPI, IGKC, KRT4, FLG, KRT10, MUC5B, KLK12, KRT16, SPRR2F, CCL5, IGLC1, WFDC2, FABP4, H19, S100A11, TFF3, HLA-DRB1, PLSCR1, DEFB4B, KLK5, FTH1, CD74, KLK7, SPINK5, STAT1, S100A2, S100A7A, SAA1, OLFM4, CRISP3, PIGR, TYMP, PI3, ALOX12, DUSP5, MT2A, PAX8-AS1, C3, TMSB10, LYZ, SOD2, LGALS7, LOR, SCGB1D2, TSC22D2
High_IM	144	HLA-B, B2M, IGHG1, IFI27, S100A7, IGHG2, IGHG4, A2ML1, CRISP3, IGKC, SPINK5, ALOX12, S100A2, SOD2, KRT4, IGHG3, S100A6, S100A7A, SPRR3, SFTA2, KRT16, MT2A, S100A11, RPS27, MUC21, RHCG, RPS16, IL36G, TMSB10, RPS12, TYMP, APOBEC3A, PAX8-AS1, IGLC1, BNIPL, SLPI, NKG7, RPL34, FLG, EMP1, KLK7, APOL1, SPRR2F, RPS19, CEACAM1, RPS21, KLK5, SERPINB13, ID1, H19, HCG22, RPL37, PLA2G4D, LYZ, ISG15, PI3, DSG1…
Low_IM	116	IGHG1, S100A7, KRT4, B2M, IFI27, PPDPF, S100A2, S100A11, IGHG2, TMSB10, HLA-B, IGHG3, CEACAM1, KRT16, S100A7A, SLPI, KLK10, CALML5, TYMP, H19, CALML3, SPRR2F, RPL27A, RPS28, CRISP3, CDH3, A2ML1, UPK3BL1, SOD2, MGST1, RPL18A, IGHG4, ANXA1, PI3, FAU, KRT6B, RPL37, PITX1, IGKC, AHNAK, EDN3, DEFB4A, ACTN4, ACTN1, ANXA8L1, MUC5B, IGLC1, PDCD4, FOSL2, ALOX12, MKNK2, IGFL1, S100A10, SERPINB13, FMO2, RPS…
Basal	192	S100A7, IGHG1, H19, IGHG2, PDCD4, B2M, TMSB10, GJA1, ANXA1, KRT4, CALML3, HLA-B, RPS19, RPL27A, IFI27, RPS27, RPL26, RPL23A, RPLP2, RPL37, CRABP2, IGHG3, CALML5, RPS15A, PPDPF, EDN3, RPL35A, KRT16, RPL30, RPL27, MT2A, FAU, IGHG4, RPS12, RPL34, RPS16, KRT10, RPL41, RPL36, RPS20, RPL38, KRT13, RPS25, RPS28, PI3, UPK3BL1, AHNAK, PABPC3, GNAS, S100A2, RPS29, TPT1, ZNF703, ENSA, ID1, IGKC, VAV3, RPL36…
Superficial:High_IM	43	IGHG1, S100A7, DEFB4A, IGHG2, IGHG4, B2M, IFI27, HLA-B, IGHG3, SLPI, IGKC, KRT4, FLG, MUC5B, KRT16, SPRR2F, CCL5, IGLC1, WFDC2, FABP4, H19, S100A11, HLA-DRB1, DEFB4B, KLK5, FTH1, KLK7, SPINK5, STAT1, S100A2, S100A7A, SAA1, OLFM4, CRISP3, TYMP, PI3, ALOX12, MT2A, PAX8-AS1, TMSB10, LYZ, SOD2, LOR
Superficial:Low_IM	35	IGHG1, S100A7, DEFB4A, IGHG2, IGHG4, B2M, IFI27, HLA-B, IGHG3, SLPI, IGKC, KRT4, KRT10, MUC5B, KLK12, KRT16, SPRR2F, CCL5, IGLC1, FABP4, H19, S100A11, SPINK5, S100A2, S100A7A, OLFM4, CRISP3, TYMP, PI3, ALOX12, MT2A, TMSB10, LYZ, SOD2, LOR
Superficial:Basal	36	IGHG1, S100A7, DEFB4A, IGHG2, IGHG4, B2M, IFI27, HLA-B, IGHG3, IGKC, KRT4, FLG, KRT10, MUC5B, KLK12, KRT16, SPRR2F, IGLC1, FABP4, H19, S100A11, HLA-DRB1, KLK5, CD74, STAT1, S100A2, S100A7A, SAA1, OLFM4, TYMP, PI3, ALOX12, MT2A, PAX8-AS1, TMSB10, SOD2
High_IM:Low_IM	64	HLA-B, B2M, IGHG1, IFI27, S100A7, IGHG2, IGHG4, A2ML1, CRISP3, IGKC, SPINK5, ALOX12, S100A2, SOD2, KRT4, IGHG3, S100A6, S100A7A, KRT16, MT2A, S100A11, RPS27, MUC21, RPS16, IL36G, TMSB10, RPS12, TYMP, IGLC1, SLPI, NKG7, RPL34, SPRR2F, RPS19, CEACAM1, SERPINB13, ID1, H19, RPL37, PLA2G4D, LYZ, PI3, KRT6B, IGLC2, LY6D, DEFB4A, CCL5, KRT14, RPL18A, OLFM4, FMO2, PPDPF, CALML5, FABP4, RPL27, MUC5B, LOR,…
High_IM:Basal	67	HLA-B, B2M, IGHG1, IFI27, S100A7, IGHG2, IGHG4, A2ML1, IGKC, ALOX12, S100A2, SOD2, KRT4, IGHG3, S100A7A, KRT16, MT2A, S100A11, RPS27, RPS16, TMSB10, RPS12, TYMP, PAX8-AS1, IGLC1, BNIPL, RPL34, FLG, SPRR2F, RPS19, RPS21, KLK5, SERPINB13, ID1, H19, RPL37, PI3, DSG1, IGLC2, DEFB4A, RPS29, RPS15A, KRT14, RPL18A, SAA1, STAT1, HSPA8, RPS18, RPL21, OLFM4, PPDPF, CALML5, FABP4, RPL38, RPL27, HLA-DRB1, MU…
Low_IM:Basal	76	IGHG1, S100A7, KRT4, B2M, IFI27, PPDPF, S100A2, S100A11, IGHG2, TMSB10, HLA-B, IGHG3, KRT16, S100A7A, KLK10, CALML5, TYMP, H19, CALML3, SPRR2F, RPL27A, RPS28, A2ML1, UPK3BL1, SOD2, RPL18A, IGHG4, ANXA1, PI3, FAU, RPL37, IGKC, AHNAK, EDN3, DEFB4A, ACTN4, ANXA8L1, MUC5B, IGLC1, PDCD4, FOSL2, ALOX12, SERPINB13, RPS27, MT2A, KRT17, RPS20, RPS16, FABP4, PABPC1, RPS12, ID1, PABPC3, ATP5ME, RPS19, KLK12…
Superficial:High_IM:Low_IM	33	IGHG1, S100A7, DEFB4A, IGHG2, IGHG4, B2M, IFI27, HLA-B, IGHG3, SLPI, IGKC, KRT4, MUC5B, KRT16, SPRR2F, CCL5, IGLC1, FABP4, H19, S100A11, SPINK5, S100A2, S100A7A, OLFM4, CRISP3, TYMP, PI3, ALOX12, MT2A, TMSB10, LYZ, SOD2, LOR
Superficial:High_IM:Basal	33	IGHG1, S100A7, DEFB4A, IGHG2, IGHG4, B2M, IFI27, HLA-B, IGHG3, IGKC, KRT4, FLG, MUC5B, KRT16, SPRR2F, IGLC1, FABP4, H19, S100A11, HLA-DRB1, KLK5, STAT1, S100A2, S100A7A, SAA1, OLFM4, TYMP, PI3, ALOX12, MT2A, PAX8-AS1, TMSB10, SOD2
Superficial:Low_IM:Basal	29	IGHG1, S100A7, DEFB4A, IGHG2, IGHG4, B2M, IFI27, HLA-B, IGHG3, IGKC, KRT4, KRT10, MUC5B, KLK12, KRT16, SPRR2F, IGLC1, FABP4, H19, S100A11, S100A2, S100A7A, OLFM4, TYMP, PI3, ALOX12, MT2A, TMSB10, SOD2
High_IM:Low_IM:Basal	47	HLA-B, B2M, IGHG1, IFI27, S100A7, IGHG2, IGHG4, A2ML1, IGKC, ALOX12, S100A2, SOD2, KRT4, IGHG3, S100A7A, KRT16, MT2A, S100A11, RPS27, RPS16, TMSB10, RPS12, TYMP, IGLC1, RPL34, SPRR2F, RPS19, SERPINB13, ID1, H19, RPL37, PI3, IGLC2, DEFB4A, KRT14, RPL18A, OLFM4, PPDPF, CALML5, FABP4, RPL27, MUC5B, FAU, KLK10, RPS28, RPS20, KRT17
Superficial:High_IM:Low_IM:Basal	27	IGHG1, S100A7, DEFB4A, IGHG2, IGHG4, B2M, IFI27, HLA-B, IGHG3, IGKC, KRT4, MUC5B, KRT16, SPRR2F, IGLC1, FABP4, H19, S100A11, S100A2, S100A7A, OLFM4, TYMP, PI3, ALOX12, MT2A, TMSB10, SOD2

## Sheet: Overlap SubMuc
name	n	intersections
Clus_4	155	IGHG1, IGHG2, B2M, IGHG3, S100A7, HLA-B, IGHG4, IGKC, KRT4, MT2A, H19, IGLC2, IGLC1, RPL34, FABP4, RPS27, SPRR3, RPL37, KRT16, RPS15A, CALML3, RPL30, HLA-DRB1, RPL23A, SPINK5, TMSB4X, MUC21, IRF1, IGHGP, RPS29, CRABP2, RPL39, RPL26, KRT10, IGHM, DST, S100A2, RASD1, RPS20, CCL5, IGFBP6, WFDC2, RPL41, MSMO1, RPL35A, KRT1, SOD2, NKG7, FAM25A, HLA-A, SQLE, NNMT, CRCT1, RPS12, ADRA2C, HSPA8, FTH1, RPS…
Clus_1	79	IGHG1, IGKC, IGHG4, IGHG2, S100A7, IGHG3, SFRP2, IGLC2, IGLC1, KRT4, KRT14, APOD, MT2A, S100A2, IGHM, SPRR3, HLA-B, KRT16, RPS27, FABP4, FTL, IGLC3, WFDC2, H19, B2M, IGFBP6, CALML5, IFI27, CLU, DPEP1, EMP1, CRISP3, RASD1, NEAT1, ALOX12, TGM2, CCL5, DEFB4A, TRBC1, IGHGP, OLFM4, TMSB4X, COL1A2, SOD2, MUC5B, PI3, NNMT, S100A11, PEMT, LUM, TAP1, PI16, AQP1, FAU, PTN, IFITM1, IGFBP7, CPNE7, KRT10, TRB…
Clus_10	91	IGHG1, IGHG2, IGHG4, S100A7, IGHG3, IGLC1, MT2A, SFRP2, IGKC, SPRR3, KRT4, IGLC2, WFDC2, MTRNR2L12, IGFBP7, HLA-DRB5, SLPI, DPEP1, CCDC80, PDGFRA, C3, KRT13, DST, RASD1, RPS27, FTL, LUM, SPRR1B, NEAT1, MUC5B, KRT34, SFN, APOD, CSTA, WNT16, TIMP3, DERL3, APCDD1, FTH1, IGHM, FAU, FABP4, SPINK5, SAMD11, CRCT1, ACTB, MZB1, MT1E, TMSB4X, S100A8, IGLC3, LOXL4, KRTDAP, TWF2, KRT10, A2ML1, MTRNR2L8, PTN,…
Clus_4:Clus_1	56	IGHG1, IGHG2, B2M, IGHG3, S100A7, HLA-B, IGHG4, IGKC, KRT4, MT2A, H19, IGLC2, IGLC1, RPL34, FABP4, RPS27, SPRR3, KRT16, RPS15A, HLA-DRB1, TMSB4X, MUC21, IGHGP, KRT10, IGHM, S100A2, RASD1, CCL5, IGFBP6, WFDC2, RPL41, SOD2, NNMT, FTL, TGM2, KRT14, MUC5B, DEFB4A, CNFN, IFI27, CALML5, TAP1, OLFM4, IGLC3, SFRP2, PABPC3, IFITM1, LUM, FAU, SLPI, PI3, MAL, PI16, CRISP3, PIGR, TRBC2
Clus_4:Clus_10	46	IGHG1, IGHG2, IGHG3, S100A7, IGHG4, IGKC, KRT4, MT2A, IGLC2, IGLC1, FABP4, RPS27, SPRR3, RPS15A, SPINK5, TMSB4X, RPS29, KRT10, IGHM, DST, RASD1, WFDC2, RPL41, KRT1, SOD2, CRCT1, FTH1, FTL, KRT13, TGM2, KRTDAP, MUC5B, RHCG, S100A14, PDGFRA, MT1E, HLA-DRB5, IGLC3, SFRP2, LUM, FAU, SLPI, SCGB1D2, A2ML1, CD3D, PIGR
Clus_1:Clus_10	39	IGHG1, IGKC, IGHG4, IGHG2, S100A7, IGHG3, SFRP2, IGLC2, IGLC1, KRT4, APOD, MT2A, IGHM, SPRR3, RPS27, FABP4, FTL, IGLC3, WFDC2, DPEP1, RASD1, NEAT1, ALOX12, TGM2, TMSB4X, SOD2, MUC5B, PEMT, LUM, FAU, PTN, IGFBP7, KRT10, MT1M, PIGR, RPL41, TIMP3, SLPI, RPS15A
Clus_4:Clus_1:Clus_10	30	IGHG1, IGHG2, IGHG3, S100A7, IGHG4, IGKC, KRT4, MT2A, IGLC2, IGLC1, FABP4, RPS27, SPRR3, RPS15A, TMSB4X, KRT10, IGHM, RASD1, WFDC2, RPL41, SOD2, FTL, TGM2, MUC5B, IGLC3, SFRP2, LUM, FAU, SLPI, PIGR
